# Supplementary material for: Synthesis of Novel Nicotinic Ligands with Multimodal Action: Targeting Acetylcholine α4β2, Dopamine and Serotonin Transporters
Source: MDPI journal article supplement (doi:10.3390/molecules24203808), 2019-10-22
Supplement: s1 [file s1]

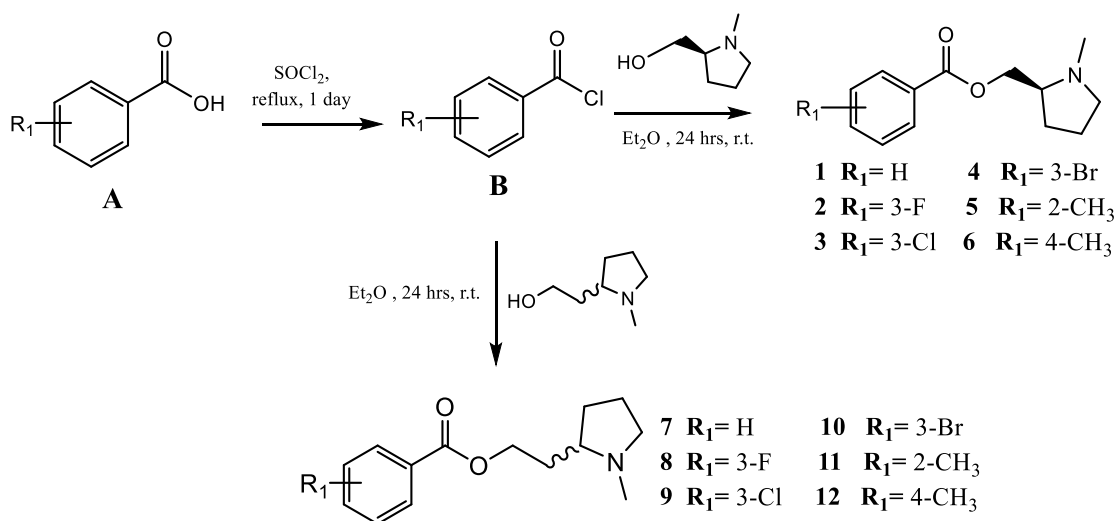

Figure S1.- Synthesis of benzoate derivatives (1-12).

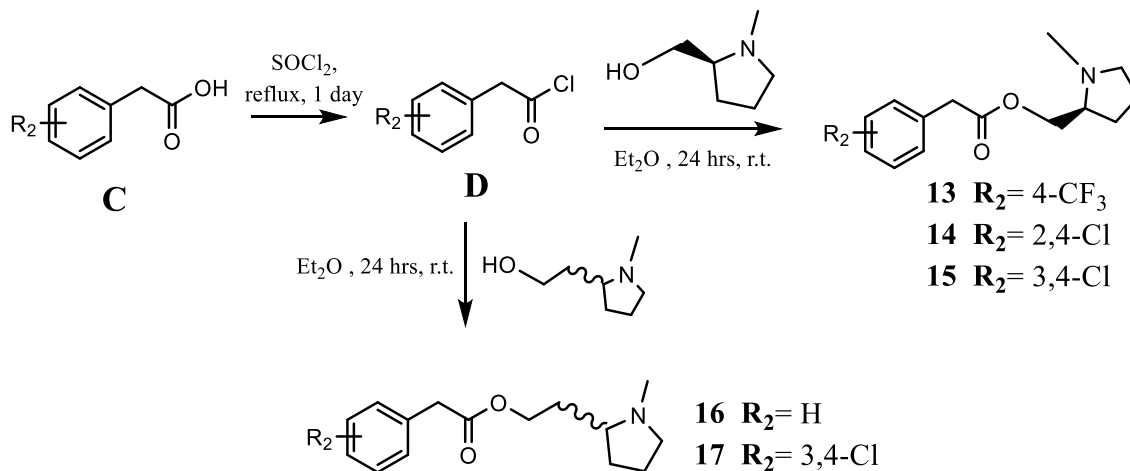

Figure S2.- Synthesis of 2-phenylacetate derivatives (13-17).

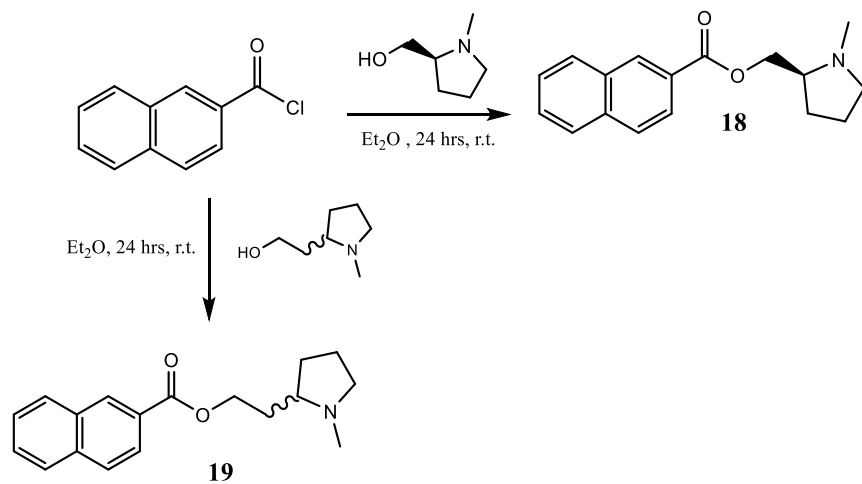

Figure S3.- Synthesis of 2-naphthoate derivatives (18-19).

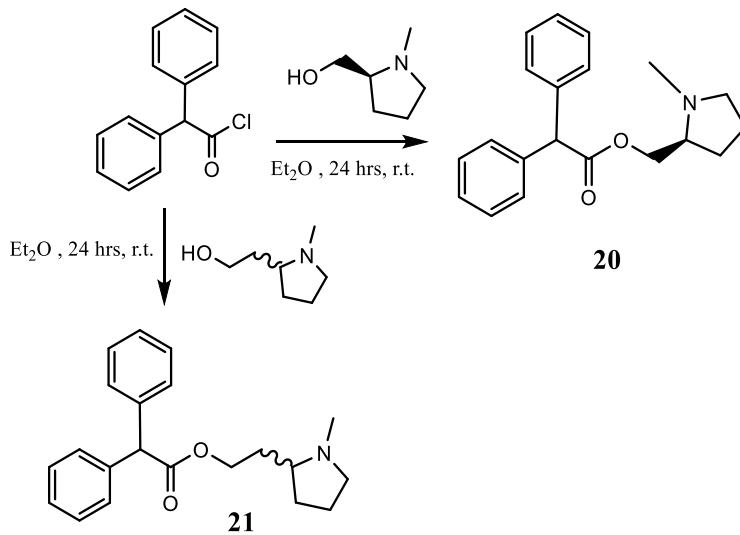

Figure S4.- Synthesis of 2,2-diphenylacetate derivatives (20-21).
